# Supplementary material for: Short-term, manualized schema-focused group therapy for patients with CBT-resistant disorders within primary care: a pilot study with a naturalistic pre-treatment and post-treatment design
Source: Frontiers journal article supplement (doi:10.3389/fpsyg.2024.1349329), 2024-03-26
Supplement: Data_Sheet_1.xlsx [file Data_Sheet_1.xlsx]

## Sheet: Dataset
PPnr 1	Groep	age	seks	Education	DSM	Occupation	YSQ_mean1	SMI_AD1	SMI_MAD1	SQ48_ANX1	SQ48_DEP1	SQ48_FIT1	SQ48_TOTAL1	YSQ_mean2	SMI_AD2	SMI_MAD2	YSQ_mean3	SMI_AD3	SMI_MAD3	SQ48_ANX2	SQ48_DEP2	SQ48_FIT2	SQ48_TOTAL2
010284VE	Venray (Sanne/Irka	38	F	HBO	Depression	Unemployed	2.92	4.25	2.59	19	13	10	76	1.89	5.15	2.06	1.49	5.3	1.52	22	14	13	85
010474RE	Weert (Femke/Moniek)	48	F	HBO	Depression, recurring	Mental healthcare	2.65	3.65	2.38	16	11	13	63	2.8	3.6	2.37	1.7	3.7	2.38	13	9	11	48
020375VE	Venlo (Eefje/Birte)	47	F	MBO	Depression, recurring	Health care		4.05	3.22
020502KN							2.33	4.2	2.29	15	13	14	73
020970HA							2.05	3	2.55	8	12	12	46	2.6	2.75	3.22
021161SN	Helmond (Loes/Chantal)	61	m	HBO	Depression, recurring	Cook	2.35	4.2	2.29	18	13	11	72	3.11	3.25	3	3.02	3.35	2.82	9	8	15	47
021288PE	Weert (Helen/Roy)	33	M	HBO	social anxiety	Logistics	2.75	3.65	3.04	8	8	11	36	2.29	3.9	2.7
030962BR	Venlo (Linda/Divina)	62	M	HBO	Depression, recurring	Logistics	3.1	3.15	2.52	18	16	16	78
031185BA	Weert (Bart/Helen)	36	M	HBO	Depression, recurring	Mechanic	4.31	3	4.38	17	11	5	81	3.57	3.4	3.52	2.88	4.1	2.71	9	6	2	33
041189TO	Boxmeer (Irka/Yvet)	32	F	HBO	Depression, recurring	Mental healthcare	2.56	3.35	2.23	12	13	11	58	1.96	4.85	1.78	1.33	4.9	1.6	7	3	4	16
040161SC		61	M	MBO	Depression, recurring	Health care	1.87	1.88	2.04	19	18	17	78	1.71	4.75	1.92	1.61	5	1.96	4	1	6	13
040285JO	Boxmeer (Irka/Yvet)	37	F	MBO	Obsessive compulsive personality disorder		2.06	3.75	2.33	10	11	17	42	1.99	3.9	2.04	1.42	4.55	1.76	4	1	7	13
040894MO	Venlo (Linda/Divina)
050476LE	Weert (Femke/Moniek)	48	F	HO	Depression	Health care	2.6	4.55	2.69	16	10	13	68	2.43	4.7	2.73	1.93	5.25	1.81	6	5	8	23
050573EV	Venlo (Eefje/Birte)	49	F	MBO	PS NAO	beleidsmedewerker	2.99	3.45	2.48	16	9	12	71	2.78	3.58	2.21
060780LE	Venlo (Linda/Divina)	42	M	HBO	PS	Health care	3.44	3.15	3.22	15	18	18	84	3.31	3.6	3.3	2.7	3.95	2.73	12	14	14	68
060995JA	Venlo (Eefje/Birte)	26	F	HBO	PS NAO	uitzendbureau	3.19	2.8	2.9	21	18	18	91
061094HE		27	M	MBO	Depression, recurring	student	2.88	2.45	3.11					3.23
070375AH							2.12	4.4	2.27	17	10	10	63
070868BE	Venray (Annemiek/Mandy	53	M	MBO	PS NAO	Logistics	2.76	4	2.61	12	11	11	51	2.33	3.85	2.24	1.92	4.2	2.14	4	8	7	29
070963HO																				8	5	7	19
071291AR	Venray (Sanne/Irka	30	F	HO	Anxiety	Health care	3.75	2.7	3.14	20	18	17	98	3.58	3.05	2.75	2.46	3.65	2.15	10	7	11	39
080556RU	Weert (Femke/Moniek)	66	F	HBO	PS NAO	Teacher	1.94	3.9	1.78	10	9	12	48	1.8	4.85	1.68	1.57	4.7	1.45	1	0	4	6
080882AL	Venray (Annemiek/Mandy	39	F	MBO	social anxiety	Unemployed	2.58	3.65	3.2	9	6	12	56	3.06	3.65	3.53	2.81	4.1	2.87	4	4	6	17
090288RU	Venlo (Linda/Divina)	34	F	VMBO	Depression, recurring	Health care	1.96	4.75	1.63					1.74	4.9	1.68	1.67	1.47
091092JA	Weert (Helen/Roy)	29	F	MBO	Depression, recurring	Teacher	3.84	3.2	3.6	15	14	15	65	3.11	3.55	2.76
100298JO	Einhoven (Dieke/Loes)	24	F	MBO	PTSD	Horeca	2.26	4.3	2.4	13	8	9	62	3.24	3.35	3	2.85	3.65	3.1	7	3	14	48
100665GE	Weert (Helen/Roy)	57	F	VMBO	Depression, recurring	Health care	1.99	3.9	2	18	15	10	70	1.9	4.2	2.23
100789BR	Venray (Susanne/Annemiek)	33	F	LO	Depression	secretary	4.14	2.55	3.93	22	12	16	93	3.23	3.25	3.12	1.96	3.7	2.41	15	10	10	67
100899VA	Weert (Sanne/Helen)	23	F	MBO	PTSD	student	3.72	3.6	2.91	18	13	14	83	3.78	3.2	2.95	2.98	4.45	2.28	12	13	10	48
101075GU	Venlo (Eefje/Birte)	46	F	VMBO	Depression, recurring	Logistics	2.33	4.5	2.92	7	3	4	41	2.3	4.4	2.55	1.86	4.8	1.94	3	1	1	17
110286PO	Einhoven (Dieke/Loes)	36	M	MBO	PS NAO	Bus driver	2.3	4.55	2.9	7	3	4	41	2.3	4.45	2.54	1.86	4.8	1.94	4	1	4	16
110763BE	Venray (Susanne/Annemiek)	59	M	HO	Depression, recurring	Unemployed	2.43	4	2.09	16	15	11	75	2.42	4.45	2.17	2.28	4.75	1.47	12	8	5	54
111002ME	Oss (Roëlle/Linda)	20	F	LO	PTSD	student	2.23	4.25	2.58	10	6	8	41	1.87	4.5	2.06	1.98	4.5	2.19	8	2	2	31
120296EE		26	F	HO	Depression, recurring	Student	4.32	3	4	21	20	16	115	3.53	3.65	3.3	1.72	4.8	1.63	12	13	12	54
120691BA	Venray (Irka/Sanne)	4.8	F	HO	PS NAO	Self employed	1.68	4.7	1.94	7	3	12	26	1.71	4.65	2.27	1.55	4.95	2.23	2	4	10	14
120984TI	Weert (Femke/Moniek)	37	M	LO	Depression, recurring	Logistics	2.86	3	2.87					2.63				3.85	2.6
130283HO	Boxmeer (Irka/Yvet)	39	F	LO	GAS	Mental healthcare	2.71	3.55	2.51	19	9	17	71	2.39	4.05	2.22	1.99	4.25	2	13	6	13	44
130296WA	Venray (Sanne/Irka	26	F	HO	PD	Engineer	2.83	4.3	2.66	13	10	11	74	2.08	4.1	2.18	1.76	4.65	1.98	4	3	7	25
130797ST	Venlo (Eefje/Birte)	25	M	LO	PS NAO	Logistics	3.53	3.3	2.87
130999BO	Venlo (Linda/Divina)						2.88	3.45	2.82	14	5	9	44	3.21	3.95	2.89	1.9	4.5	1.96	14	5	7	42
140992BO	Oss (Roëlle/Linda)	30	F	HO	Depression, recurring	Teacher	2.68	4.5	2.49	21	16	13	95	2.69	3.75	2.69	2.19	4.5	2.22	13	10	12	58
140993ST	Weert (Bart/Helen)	29	F	HO	PS NAO	beleidsmedewerker	2.84	3.25	3.34	13	13	12	61	2.21	3.85	2.28	1.73	4.51	1.69	6	5	7	31
140560NO	Weert (Helen/Roy)	62	F	LO	Depression, recurring	Mental healthcare	3.61	3.3	3.63	16	17	16	94	1.91	4.2	1.9	8	7	12	45	7	16	38
141180BO	Weert (Sanne/Helen)	41	F	LO	Depression	Mental healthcare	2.05	3.85	2.54	7	9	15	49	1.93	3.5	2.02	1.75	3.5	1.52	3	6	10	21
150381BO	Helmond (Loes/Chantal)	41	F	LO	Depression, recurring	Transport	2.86	2.9	3	15	15	17	67	2.9	2.9	3.23	2.08	3.5	2.85	14	12	14	52
150578BO							2.72	3.3	3.09	15	11	9	58
150992BE	Venray (Irka/Sanne)	29	F	LO	social anxiety	chemical analist	3.51	3.65	3.3	20	13	15	82	3.43	4.45	3.77	2.52	4.8	2.87	13	6	5	49
151286RO	Weert (Sanne/Helen)	35	F	LO	GAS	Hairdresser	2.69	2.95	2.65	15	15	13	92	2.48	3.3	2.85	2.18	3.8	2.41	9	8	7	32
160275CO	Venray (Susanne/Annemiek)	47	M	LO	Depression, recurring	Unemployed	2.23	3	2.55	12	9	14	44	2.4	2.95	2.6	2.08	2.95	2.16	6	4	7	28
160377SC	Venray (Annemiek/Mandy	45	F	MBO	Depression, recurring	Hairdresser	3.87	3.25	2.6	2	20	14	103	3.3	3.7	2.73
160391VI	Boxmeer (Irka/Yvet)	31	F		Depression, recurring	Health care	2.88	3.7	2.91	13	15	13	74	2.36	3.7	2.69
160589TH	Boxmeer (Irka/Yvet)	33	F	MBO	Social anxiety	Logistics	1.92	4.6	1.95	10	16	12	53	1.99	4.55	2.03	1.61	5.05	1.67	10	7	5	29
170192DE	Weert (Sanne/Helen)	30	F	MBO	Anxiety disorder	unknown	3.63	3.35	3.46	18	17	14	66	3.01	3.9	3.39	2.4	4.8	2.52	6	8	5	32
170280VO							2.05	3.35	2.71					2.42	3.05	2.8
170572PI	Oss (Roëlle/Linda)	50	F	HBO	Depression, recurring	Student	2.82	2.9	2.92	17	19	22	68	2.39	3.4	2.65	2.54	4.15	1.98	17	13	10	58
171293VI	Weert (Bart/Helen)	28	F	MBO	Depression, recurring	Health care	2.97	3.05	3.31	8	8	14	44	3.11	3.2	2.36	2.42	4.6	1.58	3	4	9	18
171296MA	Einhoven (Dieke/Loes)	25	M	HBO	GAS	student	3.1	2.85	2.99	17	17	12	69	2.7	3.2	2.86	2.36	3.5	2.58	15	13	13	56
180283HE	Weert (Femke/Moniek)	39	F	LO	Depression	Healthcare	3.08	2.95	2.64	15	10	12	59	1.82	4.45	1.65	1.28	4.95	1.4	6	2	0	17
180593LA	Weert (Femke/Moniek)	29	F	MBO	Depression, recurring	Hairdresser	2.61	3.5	3.3	14	12	15	69	2.51	3.9	2.53	2.07	3.52	2.31	8	9	10	38
180870JA	Weert (Sanne/Helen)	51	M	HBO	social anxiety	Health care	3.33	3	2.9	17	18	18	69
190668VE	Oss (Roëlle/Linda)	54	M	MBO	Depression, recurring	Health care	1.89	4.4	9	14	16	54	1.52	4.8	1.75	1.75	1.12	5.35	1.38	0	2	1	2
191261TR	Weert (Bart/Helen)	60	M	HBO	Depression, recurring	Unemployed	3.57	4	5.57	11	12	9	54	2.6	3.95	3.05	2.39	4.45	2.42	7	5	11	31
201093JA		28	M	MBO	Depression, recurring	Harbour	3.2	2.75	3.05	20	20	16	79	2.68	3.35	2.63	2.28	3.65	2.18	2	4	13	17
201262TU	Venlo (Linda/Divina)	59	F	VMBO	PS NAO	Unemployed	2.85	4.2	3	21	19	15	114
201279KE	Venlo (Linda/Divina)	42	M	HBO	Depression, recurring	Logistics	2.94	3.75	2.56	15	11	13	60	2.72	47	2.52	2.54	4.3	2.48	10	6	11	37
PPnr 1		age	seks	Education	DSM	Occupation	YSQ_mean1	SMI_AD1	SMI_MAD1	SQ48_ANX1	SQ48_DEP1	SQ48_FIT1	SQ48_TOTAL1	YSQ_mean2	SMI_AD2	SMI_MAD2	YSQ_mean3	SMI_AD3	SMI_MAD3	SQ48_ANX	SQ48_DEP2	SQ48_FIT2	SQ48_TOTAL2
210382NO							2.75	3.75	2.83	11	10	8	45
210397HA	Weert (Femke/Moniek)	25	M	VMBO	Depression, recurring	Logistics	2.89	3.15	2.99	16	15	12	64
220485KA	Weert (Femke/Moniek)	37	F	MBO	Avoidant PD	Health care	2.03	4.95	2.46	16	15	12	64	2.08	5.15	2.22	2.39	4.45	2.42	7	5	11	31
220570KL	Boxmeer (Irka/Yvet)	52	F	HBO	Depression, recurring		1.87	3.95	2.36	21	15	22	65	1.62	4.2	1.65	1.63	4.2	1.67	13	6	14	45
231271RO	Weertn(Femke/Moniek	51	F	HBO	Anxiety disorder	Unemployed	2.53	3.35	2.55	17	13	15	82	3.3	3.15	2.74	3.15	3.3	2.9	12	9	10	65
230892HA	Venlo (Linda/Divina)	30	F	HBO	Anxiety disorder	Health care	3.43	3.3	3.72	21	22	13	88	2.73	4.4	2.4	1.89	4.7	1.54	4	3	8	21
240193LA	Einhoven (Dieke/Loes)	29	F	HBO	Avoidant PD	Healthcare	3.61	3.3	3.44	22	19	11	88	3.21	3.25	3.21	2.43	3.85	2.38	13	8	11	50
240366GE	Helmond (Loes/Chantal)	56	F	HBO	Anxiety disorder	Healthcare	3.26	2.7	3.12	10	11	7	51	2.64	3.85	2.87	2.37	4.15	2.02	4	3	6	16
240366PE	Helmond (Loes/Chantal)	32	F	HO	PD	healthcare	1.43	4.5	1.93	9	7	9	43	1.62	3.65	1.93	1.31	4.95	1.56	4	3	4	31
240276MO	Helmond (Loes/Chantal)	46	F	HO	PD	Health care	3.26	2.7	3.13	12	11	15	61	2.64	3.85	2.87	1.63	4.2	2.02	5	6	4	18
240289SP	Venray (Annemiek/Mandy	33	F	MBO	Borderline PD	Health care	2.91	3.1	3.14	12	14	14	71	3.25	2.85	2.93
250180RO	Venlo (Eefje/Birte)	42	M	MBO	Narcisistic PD	Police	2.01	3.4	3.02	13	17	19	54
250203HU	Oss (Roëlle/Linda)	19	M	MBO	social anxiety	student	3.18	2.85	2.96	16	9	10	63
250285ZA	Venlo (Linda/Divina)	37	f	VMBO	Avoidant PD	Gemeente	1.99	3.5	2.32	23	11	17	87	2.15	3.75	3.06	1.79	4.05	2.17	17	10	14	77
250691HU	Venray (Annemiek/Mandy	31	F	HBO	social anxiety	Mental healthcare	3.31	2.95	2.81	9	8	11	47	3.31	3.05	2.94	3.22	3.2	2.87	13	11	14	56
251188LE	Weert (Femke/Moniek)	33	M	VMBO	Borderline PD	Logistics	2.44	4.15	2.76	11	9	9	47	1.96	4.45	2.09	1.77	4.1	1.97	3	4	8	14
251269VR	Boxmeer (Irka/Yvet)	52	F	HBO	GAS	administration	2.57	3.5	3.09	18	13	15	91	2.4	3.75	2.86	2.2	3.75	2.57	16	10	10	71
260297ES	Weert (Bart/Helen)						2.68	2.8	2.99	16	12	10	73	3.13	3.45	2.35	2.15	4.25	1.98	13	6	7	44
260281LI	Venray (Irka/Sanne)	41	M	HBO	GAS	Accountmanager	2.47	3.65	2.36	14	15	14	68	2.74	3.7	2.42	2.41	3.9	2.45	13	11	16	58
260463BR	Venlo (Linda/Divina)	59	M	HBO	Obsessive compulsive personality disorder	Engineer	3.7	2.85	3.21	20	13	14	80	3.09	3.1	2.91	2.27	3.8	2.41	11	6	8	36
260786TH	Venray (Susanne/Annemiek)	36	F	MBO	Depression, recurring	Daycare	2.03	3.7	2.36	13	10	9	59	2.22	3.85	2.6	2.29	3.95	2.55	10	9	8	41
270557WI							2.26	4.1	2.3
270599GE	Helmond (Loes/Chantal)	23	F	MBO	social anxiety	Health care	3.56	3.05	3.19	22	15	14	96	3.73	3.15	2.97	3.19	3.3	3.03	15	9	11	79
270896BA							2.84	4.15	2.47	14	6	6	55
270896MA							3.68	3.25	2.06	23	17	10	102	2.35	3.85	2.22
270902GR	Venray (Sanne/Irka	20	F	LO	Anxiety	student	4.13	3.05	3.09	15	13	14	82	3.39	2.9	3	3.48	3.4	2.76	17	8	9	69
271098DE	Weert (Sanne/Helen)	23	F	MBO	Depression, recurring	Health care	3.45	3.4	3.62	13	14	11	76	3.44	2.85	3.18	2.42	3.8	2.46	5	7	5	46
280190BO	Boxmeer (Irka/Yvet)	32	F	WO	2.06	Daycare	2.49	4.45	2.83	21	7	13	74	1.69	5	1.87	1.35	5.45	1.39	4	1	6	15
280490RO	Venray (Sanne/Irka	32	F	HO	Depression	Health care	3.34	3.76	3.82	26	17	13	85	2.73	4.1	2.48	2.37	4.75	1.96	9	3	2	38
280966KL	Venray (Susanne/Annemiek)	56	F	MBO	Depression, recurring	secretary	2.67	4.3	2.81	13	13	13	55	1.65	4.05	2.06	1.58	4.3	11.83	6	5	8	27
290182HE	Weert (Bart/Helen)	40	M	HBO	Depression, recurring	Engineer	2.05	3.17	3.51	14	15	13	63	1.88	3.55	2.52
290601GR	Weert (Bart/Helen)	21	M	MBO	PTSD	Logistics	3.47	3.9	3.11	16	16	7	74	3.29	4.1	2.89	2.78	4.8	1.78	13	9	4	38
290602GI	Venray (Annemiek/Mandy	20	F	MBO	Depression, recurring	Student	3.42	3.1	3.41	16	15	15	86	3.42	2.75	3.47	3.01	2.7	3.43	13	17	16	90
300475GA	Helmond (Loes/Chantal)	47	F	MBO	Anxiety disorder	unknown	2.35	3.55	2.42	17	15	10	49	1.65	5.2	1.8	1.44	5.3	1.63	6	7	8	27
300776JA	Einhoven (Dieke/Loes)	45	F	HBO	Depression, recurring	Mental healthcare	2.97	3.2	3.16	15	10	13	62	2.86	3.75	2.89	2.57	3.55	2.51	12	7	12	53
301192RA	Boxmeer (Irka/Yvet)	29	M	MBO	Avoidant PD	IT	2.74	3.3	2.83	11	13	13	50	2.63	3.5	2.58	2.28	3.8	2.28	7	5	10	27
310578CR	Venlo (Linda/Divina)	44	M	WO	Depression, recurring	unknown	2.32	4.6	2.28	9	8	7	40
311062SI																				11	9	11	53

## Sheet: Compleet
PPnr 1	Groep	age	seks	Education	DSM	Occupation	YSQ_mean1	SMI_AD1	SMI_MAD1	SQ48_ANX1	SQ48_DEP1	SQ48_FIT1	SQ48_TOTAL1	YSQ_mean2	SMI_AD2	SMI_MAD2	YSQ_mean3	SMI_AD3	SMI_MAD3	SQ48_ANX2	SQ48_DEP2	SQ48_FIT2	SQ48_TOTAL2
010284VE	Venray (Sanne/Irka	38	F	HO	Depression	Unemployed	2.92	4.25	2.59	19	13	10	76	1.89	5.15	2.06	1.49	5.3	1.52	22	14	13	45	1.07
010474RE	Weert (Femke/Moniek)	48	F	HO	Depression	Mental healthcare	2.65	3.65	2.38	16	11	13	63	2.8	3.6	2.37	1.7	3.7	2.38	13	9	11	48	0
021161SN	Helmond (Loes/Chantal)	61	M	HO	Depression	Cook	2.35	4.2	2.29	18	13	11	72	3.11	3.25	3	3.02	3.35	2.82	9	8	15	47	-0.53
031185BA	Weert (Bart/Helen)	36	M	HO	Depression	Mechanic	4.31	3	4.38	17	11	5	81	3.57	3.4	3.52	2.88	4.1	2.71	9	6	2	33	1.67
041189TO	Boxmeer (Irka/Yvet)	32	F	HO	Depression	Mental healthcare	2.56	3.35	2.23	12	13	11	58	1.96	4.85	1.78	1.33	4.9	1.6	7	3	4	16	0.63
040161SC		61	M	LO	Depression	Health care	1.87	1.88	2.04	19	18	17	78	1.71	4.75	1.92	1.61	5	1.96	4	1	6	13	0.08
040285JO	Boxmeer (Irka/Yvet)	37	F	LO	Anxiety	Unemployed	2.06	3.75	2.33	10	11	17	42	1.99	3.9	2.04	1.42	4.55	1.76	4	1	7	13	0.57
050476LE	Weert (Femke/Moniek)	48	F	HO	Depression	Health care	2.6	4.55	2.69	16	10	13	68	2.43	4.7	2.73	1.93	5.25	1.81	6	5	8	23	0.88
060780LE		42	M	HO	PD	Health care	3.44	3.15	3.22	15	18	18	84	3.31	3.6	3.3	2.7	3.95	2.73	8	11	9	47
070868BE	Venray (Annemiek/Mandy	53	M	LO	PD	Logistics	2.76	4	2.61	12	11	11	51	2.33	3.85	2.24	1.92	4.2	2.14	4	8	7	29
071291AR	Venray (Sanne/Irka	30	F	HO	Anxiety	Health care	3.75	2.7	3.14	20	18	17	98	3.58	3.05	2.75	2.46	3.65	2.15	10	7	11	39	0.99
080556RU	Weert (Femke/Moniek)	66	F	HO	PD	Teacher	1.94	3.9	1.78	10	9	12	48	1.8	4.85	1.68	1.57	4.7	1.45	1	0	4	6
080882AL	Venray (Annemiek/Mandy	39	F	LO	Anxiety	Unemployed	2.58	3.65	3.2	9	6	12	56	3.06	3.65	3.53	2.81	4.1	2.87	4	4	6	17	0.33
100298JO	Einhoven (Dieke/Loes)	24	F	LO	Anxiety	Horeca	2.26	4.3	2.4	13	8	9	62	3.24	3.35	3	2.85	3.65	3.1	7	3	14	48	-0.7
100789BR	Venray (Susanne/Annemiek)	33	F	LO	Depression	secretary	4.14	2.55	3.93	22	12	16	93	3.23	3.25	3.12	1.96	3.7	2.41	15	10	10	67	1.52
100899VA	Weert (Sanne/Helen)	23	F	LO	Anxiety	student	3.72	3.6	2.91	18	13	14	83	3.78	3.2	2.95	2.98	4.45	2.28	12	13	10	48	0.63
101075GU	Venlo (Eefje/Birte)	46	F	LO	Depression	Logistics	2.33	4.5	2.92	7	3	4	41	2.3	4.4	2.55	1.86	4.8	1.94	3	1	1	17	0.98
110286PO	Einhoven (Dieke/Loes)	36	M	LO	PD	Bus driver	2.3	4.55	2.9	7	3	4	41	2.3	4.45	2.54	1.86	4.8	1.94	4	1	4	16
110763BE	Venray (Susanne/Annemiek)	59	M	HO	Depression	Unemployed	2.43	4	2.09	16	15	11	75	2.42	4.45	2.17	2.28	4.75	1.47	12	8	5	54	0.62
111002ME	Oss (Roëlle/Linda)	20	F	LO	Anxiety	student	2.23	4.25	2.58	10	6	8	41	1.87	4.5	2.06	1.98	4.5	2.19	8	2	2	31	0.39
120296EE		26	F	HO	Depression	Student	4.32	3	4	21	20	16	115	3.53	3.65	3.3	1.72	4.8	1.63	12	13	12	54	2.37
120691BA	Venray (Irka/Sanne)	31	F	LO	PD	Self employed	1.68	4.7	1.94	7	3	12	26	1.71	4.65	2.27	1.55	4.95	2.23	2	4	10	14
130283HO	Boxmeer (Irka/Yvet)	39	F	LO	Anxiety	Mental healthcare	2.71	3.55	2.51	19	9	17	71	2.39	4.05	2.22	1.99	4.25	2	13	6	13	44	0.51
130296WA	Venray (Sanne/Irka	26	F	HO	PD	Engineer	2.83	4.3	2.66	13	10	11	74	2.08	4.1	2.18	1.76	4.65	1.98	4	3	7	25
130999BO	Venlo (Linda/Divina)	23	F	HO	PD	student	2.88	3.45	2.82	14	5	9	44	3.21	3.95	2.89	1.9	4.5	1.96	14	5	7	42
140560NO	Weert (Helen/Roy)	62	F	LO	Depression	Mental healthcare	3.61	3.3	3.63	16	17	16	94	1.91	4.2	1.9	8	4.7	1.2	45	7	16	38	2.43
140992BO	Oss (Roëlle/Linda)	30	F	HO	Depression	Teacher	2.68	4.5	2.49	21	16	13	95	2.69	3.75	2.69	2.19	4.5	2.22	13	10	12	58	0.27
140993ST	Weert (Bart/Helen)	29	F	HO	PD	beleidsmedewerker	2.84	3.25	3.34	13	13	12	61	2.21	3.85	2.28	1.73	4.51	1.69	6	5	7	31
141180BO	Weert (Sanne/Helen)	41	F	LO	Depression	Mental healthcare	2.05	3.85	2.54	7	9	15	49	1.93	3.5	2.02	1.75	3.5	1.52	3	6	10	21	1.02
150381BO	Helmond (Loes/Chantal)	41	F	LO	Depression	Transport	2.86	2.9	3	15	15	17	67	2.9	2.9	3.23	2.08	3.5	2.85	14	12	14	52	0.15
150992BE	Venray (Irka/Sanne)	29	F	LO	Anxiety	chemical analist	3.51	3.65	3.3	20	13	15	82	3.43	4.45	3.77	2.52	4.8	2.87	13	6	5	49	0.43
151286RO	Weert (Sanne/Helen)	35	F	LO	Anxiety	Hairdresser	2.69	2.95	2.65	15	15	13	92	2.48	3.3	2.85	2.18	3.8	2.41	9	8	7	32	0.24
160275CO	Venray (Susanne/Annemiek)	47	M	LO	Depression	Unemployed	2.23	3	2.55	12	9	14	44	2.4	2.95	2.6	2.08	2.95	2.16	6	4	7	28	0.39
160589TH	Boxmeer (Irka/Yvet)	33	F	LO	Anxiety	Logistics	1.92	4.6	1.95	10	16	12	53	1.99	4.55	2.03	1.61	5.05	1.67	10	7	5	29	0.28
170192DE	Weert (Sanne/Helen)	30	F	LO	Anxiety	unknown	3.63	3.35	3.46	18	17	14	66	3.01	3.9	3.39	2.4	4.8	2.52	6	8	5	32	0.94
170572PI	Oss (Roëlle/Linda)	50	F	HO	Depression	Student	2.82	2.9	2.92	17	19	22	68	2.39	3.4	2.65	2.54	4.15	1.98	17	13	10	58	0.94
171293VI	Weert (Bart/Helen)	28	F	LO	Depression	Health care	2.97	3.05	3.31	8	8	14	44	3.11	3.2	2.36	2.42	4.6	1.58	3	4	9	18	1.73
171296MA	Einhoven (Dieke/Loes)	25	M	HO	Anxiety	student	3.1	2.85	2.99	17	17	12	69	2.7	3.2	2.86	2.36	3.5	2.58	15	13	13	56	0.41
180283HE	Weert (Femke/Moniek)	39	F	LO	Depression	Healthcare	3.08	2.95	2.64	15	10	12	59	1.82	4.45	1.65	1.28	4.95	1.4	6	2	0	17	1.24
180593LA	Weert (Femke/Moniek)	29	F	LO	Depression	Hairdresser	2.61	3.5	3.3	14	12	15	69	2.51	3.9	2.53	2.07	3.52	2.31	8	9	10	38	0.99
190668VE	Oss (Roëlle/Linda)	54	M	LO	Depression	Health care	1.89	4.4	3.9	14	16	54	1.52	4.8	4.75	1.75	1.12	5.35	1.38	0	2	1	2	2.52
191261TR	Weert (Bart/Helen)	60	M	HO	Depression	Unemployed	3.57	4	5.57	11	12	9	54	2.6	3.95	3.05	2.39	4.45	2.42	7	5	11	31	3.15
201093JA	Venray (Irka/Sanne)	28	M	LO	Depression	Harbour	3.2	2.75	3.05	20	20	16	79	2.68	3.35	2.63	2.28	3.65	2.18	2	4	13	17	0.87
201279KE	Venlo (Linda/Divina)	42	M	HO	Depression	Logistics	2.94	3.75	2.56	15	11	13	60	2.72	4.3	2.52	2.54	4.7	2.48	10	6	11	37	0.08
220485KA	Weert (Femke/Moniek)	37	F	LO	PD	Health care	2.03	4.95	2.46	16	15	12	64	2.08	5.15	2.22	2.39	4.45	2.42	7	5	11	31
220570KL	Boxmeer (Irka/Yvet)	52	F	HO	Depression	Engineer	1.87	3.95	2.36	21	15	22	65	1.62	4.2	1.65	1.63	4.7	1.67	13	6	14	45	0.69
230892HA	Venlo (Linda/Divina)	30	F	HO	Anxiety	Health care	3.43	3.3	3.72	21	22	13	88	2.73	4.4	2.4	1.89	4.7	1.54	4	3	8	21	2.18
231271RO	Weertn(Femke/Moniek	51	F	HO	Anxiety	Unemployed	2.53	3.35	2.55	17	13	15	82	3.3	3.15	2.74	3.15	3.3	2.9	12	9	10	65	-0.35
240193LA	Einhoven (Dieke/Loes)	29	F	HO	PD	Healthcare	3.61	3.3	3.44	22	19	11	88	3.21	3.25	3.21	2.43	3.85	2.38	13	8	11	50
240276MO	Helmond (Loes/Chantal)	46	F	HO	PD	Health care	3.26	2.7	3.13	12	11	15	61	2.64	3.85	2.87	1.63	4.2	2.02	5	6	4	18
240366PE	Helmond (Loes/Chantal)	56	F	HO	Anxiety	Healthcare	3.26	2.7	3.12	10	11	7	51	2.64	3.85	2.87	2.37	4.15	2.02	4	3	6	16	1.1
250285ZA	Venlo (Linda/Divina)	37	f	LO	PD	Gemeente	1.99	3.5	2.32	23	11	17	87	2.15	3.75	3.06	1.79	4.05	2.17	17	10	14	57
250691HU	Venray (Annemiek/Mandy	31	F	HO	Anxiety	Mental healthcare	3.31	2.95	2.81	9	8	11	47	3.31	3.05	2.94	3.22	3.2	2.87	13	11	14	56	-0.06
251188LE	Weert (Femke/Moniek)	33	M	LO	PD	Logistics	2.44	4.15	2.76	11	9	9	47	1.96	4.45	2.09	1.77	4.1	1.97	3	4	8	14
251269VR	Boxmeer (Irka/Yvet)	52	F	HO	Anxiety	administration	2.57	3.5	3.09	18	13	15	91	2.4	3.75	2.86	2.2	3.75	2.57	16	10	10	71	0.52
260297ES	Weert (Bart/Helen)	25	F	HO	Anxiety	Health care	2.68	2.8	2.99	16	12	10	73	3.13	3.45	2.35	2.15	4.25	1.98	13	6	7	44	1.01
260281LI	Venray (Irka/Sanne)	41	M	HO	Anxiety	Accountmanager	2.47	3.65	2.36	14	15	14	68	2.74	3.7	2.42	2.41	3.9	2.45	13	11	16	58	-0.09
260463BR	Venlo (Linda/Divina)	59	M	HO	PD	Engineer	3.7	2.85	3.21	20	13	14	80	3.09	3.1	2.91	2.27	3.8	2.41	11	6	8	36
260786TH	Venray (Susanne/Annemiek)	36	F	LO	Depression	Daycare	2.03	3.7	2.36	13	10	9	59	2.22	3.85	2.6	2.29	3.95	2.55	10	9	8	41	-0.19
271098DE	Weert (Sanne/Helen)	23	F	LO	Depression	Health care	3.45	3.4	3.62	13	14	11	76	3.44	3.45	3.18	2.42	3.8	2.46	5	7	5	46	1.16
270599GE	Helmond (Loes/Chantal)	23	F	LO	Anxiety	Health care	3.56	3.05	3.19	22	15	14	96	3.73	3.15	2.97	3.19	3.3	3.03	15	9	11	79	0.16
270902GR	Venray (Sanne/Irka	20	F	LO	Anxiety	student	4.13	3.05	3.09	15	13	14	82	3.39	2.9	3	3.48	3.4	2.76	17	8	9	69	0.33
280190BO	Venray (Irka/Sanne)	32	F	HO	Depression	Laboratory	2.49	4.45	2.83	21	7	13	74	1.69	3.5	1.87	1.35	5.45	1.39	4	1	6	15	1.44
280490RO	Venray (Sanne/Irka	32	F	HO	Depression	Health care	3.34	3.76	3.82	26	17	13	85	2.73	4.1	2.48	2.37	4.75	1.96	9	3	2	38	1.86
280966KL	Venray (Susanne/Annemiek)	56	F	LO	Depression	secretary	2.67	4.3	2.81	13	13	13	55	1.65	4.05	2.06	1.58	4.3	1.83	6	5	8	27	0.98
290601GR	Weert (Bart/Helen)	21	M	LO	Anxiety	Logistics	3.47	3.9	3.11	16	16	7	74	3.29	4.1	2.89	2.78	4.8	1.78	13	9	4	38	1.33
290602GI	Venray (Annemiek/Mandy	20	F	LO	Depression	Student	3.42	3.1	3.41	16	15	15	86	3.42	2.75	3.47	3.01	3.7	3.43	13	17	16	40	-0.02
300475GA	Helmond (Loes/Chantal)	47	F	LO	Anxiety	Health care	2.35	3.55	2.42	17	15	10	49	1.65	5.2	1.8	1.44	5.3	1.63	6	7	8	27	0.79
300776JA	Einhoven (Dieke/Loes)	45	F	HO	Depression	Mental healthcare	2.97	3.2	3.16	15	10	13	62	2.86	3.75	2.89	2.57	3.55	2.51	12	7	12	53	0.65
301192RA	Weert	29	M	LO	PD	IT	2.74	3.3	2.83	11	13	13	50	2.63	3.5	2.58	2.28	3.8	2.28	7	5	10	27
		#DIV/0!																						0
																								0
																								0
																								0
					PD
					10				11										13					19	23	25	26	29	46	50	51	53	55	59	71
					3.22				2.61										1.78					2.9	1.94	2.66	2.82	3.34	2.46	3.44	3.13	2.32	2.76	3.21	2.83
					2.73				2.14										1.45					1.94	2.23	1.98	1.96	1.69	2.42	2.38	2.02	2.17	1.97	2.41	2.28
					0.49	0	0	0	0.47	0	0	0	0	0	0	0	0	0	0.33	0	0	0	0	0.96	-0.29	0.68	0.86	1.65	0.04	1.06	1.11	0.15	0.79	0.8	0.55	9.65
																																				0.643333

## Sheet: Schalen
Te gebruiken schalen
SCL-90		YSQ		SMI		Drop out rates
Interpersonal sensibility		Mean score		Mean adaptive modes (GV, BK)
Depression				Mean maladaptive modes (all others)
Anxiety
Global Symptom Index
Positive syndrome distress Index
Positive symptom total
Globale psychische belasting
aantal symptomen
ernst van de symptomen
SQ-48
Angst
Depressie
Totaal
Vitaliteit/optimisme	(0-8 = klinisch)
	2.86

## Sheet: Formules
1.6				2.3
1.89				1.2
1.33				1
1.7				2.13
1.6				2.2
1.22				2.71
1.33				2.22
1.06				2
1.4				1.4
1.55				1.11
1.56				1.6
2				2.14
2.71				22.01
2				1.83417
1.27
1.07
25.29
1.58063
2.70312				2.38417
YSQ				SMI
